# Supplementary material for: New portable smartphone-based PDMS microfluidic kit for the simultaneous colorimetric detection of arsenic and mercury
Source: Royal Society of Chemistry journal article supplement (doi:10.1039/c8ra04006k), 2018-01-01
Supplement: c8ra04006k1.pdf [file c8ra04006k1.pdf]

## Electronic Supplementary Information (ESI)

### **Portable smartphone-based new PDMS microfluidic kit for simultaneous colorimetric detection of arsenic and mercury**

Abbas Motalebizadeh <sup>a</sup>, Hasan Bagheri,<sup>b,\*</sup> Sasan Asiaei <sup>a</sup>, Nasim Fekrat<sup>c</sup>, Abbas Afkhami <sup>d</sup>

<sup>a</sup> *School of Mechanical Engineering, Iran University of Science and Technology, Tehran, Iran, 1684613114.*

<sup>b</sup> *Chemical Injuries Research Center, Systems Biology and Poisoning Institute, Baqiyatallah University of Medical Sciences, Tehran, Iran.*

<sup>c</sup> *Department of Computer, Science and research Branch, Islamic Azad University, Tehran, Iran.*

<sup>d</sup> *Faculty of Chemistry, Bu-Ali Sina University, Hamedan, Iran.*

### *Synthesis of GNPs*

Briefly, 120 mL solution containing 1 mM of  $\text{HAuCl}_4$  was prepared and heated under reflux. At the boiling point of the solution, 5 mL of 40 mM of trisodium citrate was added to this solution under vigorous stirring and the mixture was heated under reflux for an additional 15 min during which the color changed to deep red, indicating the formation of GNPs. The solution was allowed to cool at room temperature and stored at 4 °C for further use.

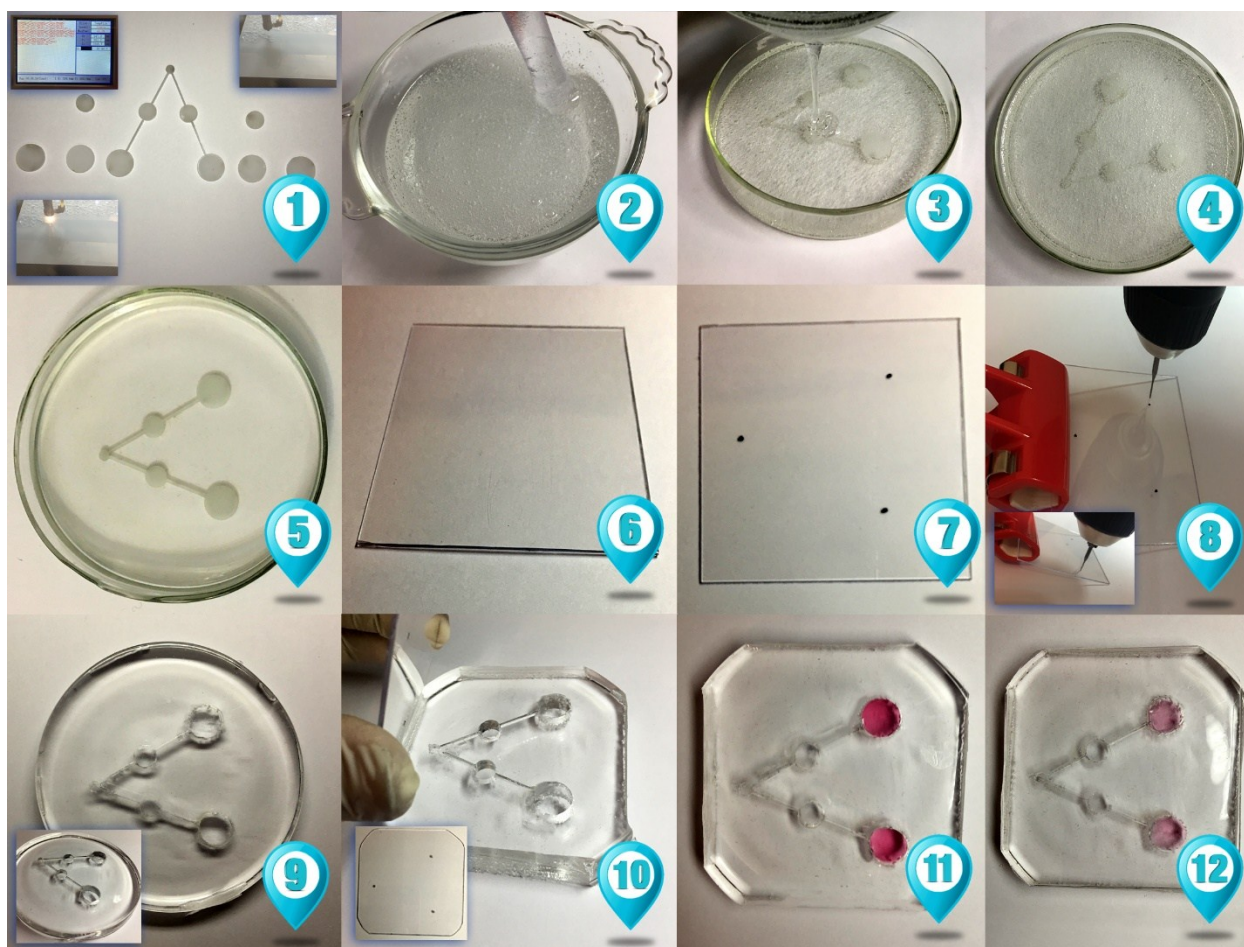

**Fig. S1. The steps of fabrication microfluidic kit**

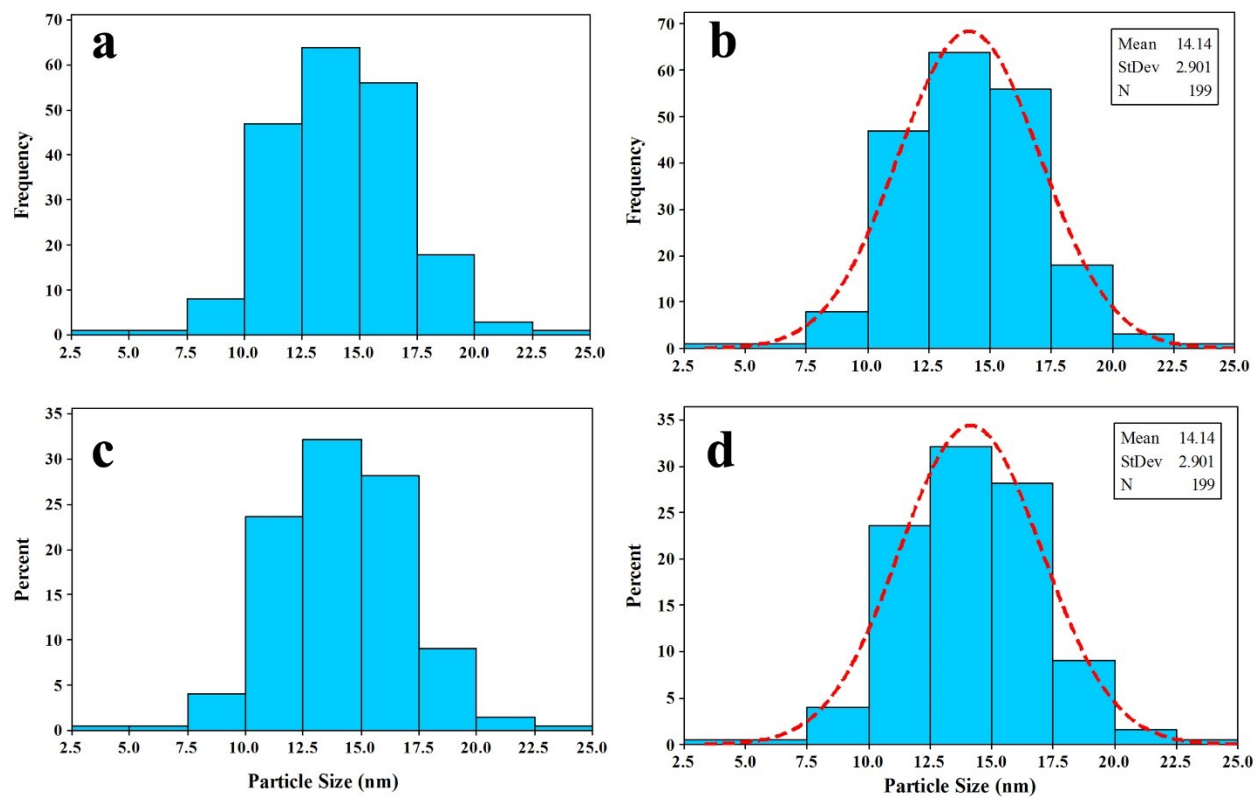

**Fig. S2.** The mean diameters, the diameter size frequency in the samples and the corresponding histogram

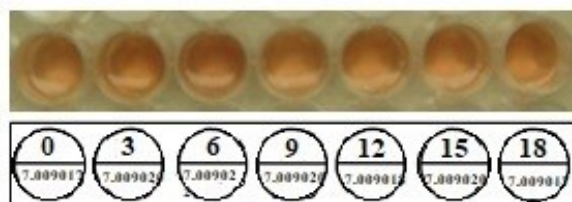

**Influence of DTT Concentration**

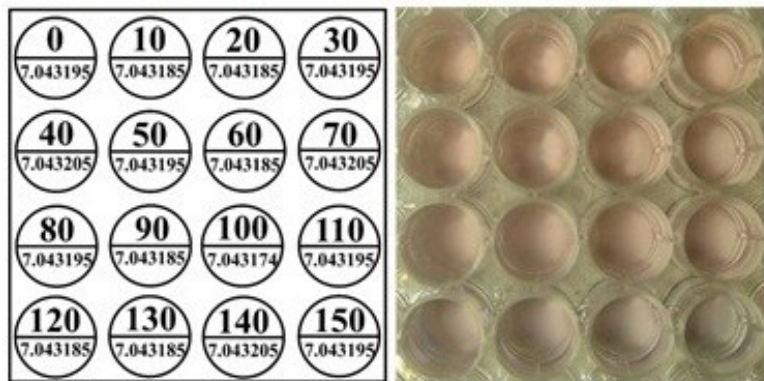

**Influence of Lysine Concentration**

**Fig. S3. Influence of DTT and Lys concentration**

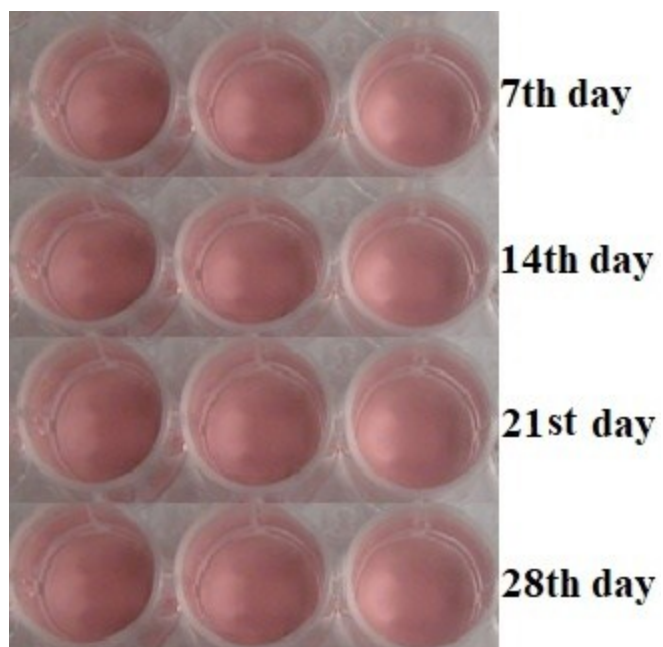

**Fig. S4.** Stability for colorimetric responses
